# Supplementary material for: Identification of a Novel Risk Model: A Five-Gene Prognostic Signature for Pancreatic Cancer
Source: Hindawi journal article supplement (doi:10.1155/2022/3660110), 2022-07-08
Supplement: f1 [file 3660110.f1.zip]

Archive with 3 entries (3 files):
- 3660110.f1/Figure S1 (1).pdf
- 3660110.f1/Table S1.docx
- 3660110.f1/Table S2.docx
