# Supplementary material for: Identification of a Novel Risk Model: A Five-Gene Prognostic Signature for Pancreatic Cancer
Source: Hindawi journal article supplement (doi:10.1155/2022/3660110), 2022-07-08
Supplement: f1 [file 3660110.f1.zip › 3660110.f1/Table S1.docx]

Table S1. The 128 independent risk factors for overall survival of pancreatic cancer.

| **Gene symbol** | |  |  |  |  |  |  |
| --- | --- | --- | --- | --- | --- | --- | --- |
| PSME1 | CHGB | AHNAK | TGFA | S100A16 | IL1RN | PPARG | OSMR |
| RFXAP | CMTM1 | SP1 | TSHB | BPIFB4 | JAG1 | PPP3CA | PRLR |
| TAP1 | CMTM6 | TNFRSF10A | TXLNA | SLC22A17 | KITLG | PPP3CB | RARG |
| TAP2 | CORT | TNFRSF10B | UCN3 | WFIKKN1 | KL | KRAS | RXRA |
| ERAP2 | DKK1 | LIMS1 | VGF | PLAU | LRSAM1 | NRAS | SDC1 |
| CXCL10 | EREG | KCNH2 | ADRB1 | OASL | NENF | PIK3CB | SDC4 |
| CXCL9 | FAM3C | CLDN4 | EGFR | TLR3 | NPPA | CKLF | SSTR2 |
| CXCL5 | FGF17 | LTB4R | EPOR | IFIH1 | NRG2 | CXCL17 | TNFRSF21 |
| CXCL11 | FGF22 | PLSCR1 | IL11RA | TRIM5 | PDGFC | SEMA3C | PLCG1 |
| DEFB1 | FIGNL2 | PCSK2 | IL15RA | STAT1 | PSPN | SEMA3G | FYN |
| LEAP2 | GDF11 | BIRC5 | IL1RAP | TNFSF10 | RABEP1 | SEMA4B | SHC2 |
| S100A10 | GDF9 | ANXA6 | IL20RB | PLAAT4 | RABEP2 | SEMA6C | PRKCG |
| S100A2 | GH1 | GBP2 | IL6R | CST4 | RLN1 | PTGDR2 | NCK1 |
| LMBR1L | GNRH2 | AGER | MC1R | BST2 | SCG2 | AREG | PAK2 |
| MAVS | IL11 | ACKR4 | MET | TYK2 | SLURP1 | CGB7 | PAK6 |
| S100A14 | IL17D | TAFA2 | NPR1 | TRAF3 | SPP1 | CHGA | MAP3K14 |
