# Supplementary material for: Identification of a Novel Risk Model: A Five-Gene Prognostic Signature for Pancreatic Cancer
Source: Hindawi journal article supplement (doi:10.1155/2022/3660110), 2022-07-08
Supplement: f1 [file 3660110.f1.zip › 3660110.f1/Table S2.docx]

Table S2. Functional enrichment analysis result (top 10 terms) of the differentially expressed genes between TCGA-PAAD tumor tissues with high and low prognostic risk scores.

| **Category** | **Description** | **Count** | **P. adjust** |
| --- | --- | --- | --- |
| **GO Biological Processes** | | |  |
| GO:0034330 | cell junction organization | 39 | 2.76E-10 |
| GO:0043588 | skin development | 46 | 9.75E-10 |
| GO:0034329 | cell junction assembly | 34 | 9.75E-10 |
| GO:0008544 | epidermis development | 47 | 7.08E-09 |
| GO:0030198 | extracellular matrix organization | 40 | 2.60E-08 |
| GO:0043062 | extracellular structure organization | 43 | 3.20E-08 |
| GO:0031638 | zymogen activation | 15 | 5.73E-08 |
| GO:0031639 | plasminogen activation | 11 | 7.09E-08 |
| GO:0070268 | cornification | 20 | 2.88E-07 |
| GO:0031589 | cell-substrate adhesion | 36 | 8.13E-07 |
| **GO Molecular Functions** | | |  |
| GO:0050839 | cell adhesion molecule binding | 61 | 1.79E-15 |
| GO:0045296 | cadherin binding | 42 | 5.94E-11 |
| GO:0098631 | cell adhesion mediator activity | 16 | 1.71E-08 |
| GO:0098632 | cell-cell adhesion mediator activity | 14 | 1.25E-07 |
| GO:0098641 | cadherin binding involved in cell-cell adhesion | 9 | 5.44E-07 |
| GO:0043236 | laminin binding | 9 | 3.62E-05 |
| GO:0001618 | virus receptor activity | 13 | 9.66E-05 |
| GO:0104005 | hijacked molecular function | 13 | 9.66E-05 |
| GO:0050840 | extracellular matrix binding | 11 | 2.21E-04 |
| GO:0004252 | serine-type endopeptidase activity | 18 | 6.08E-04 |
| **GO Cellular Components** | | |  |
| GO:0005911 | cell-cell junction | 52 | 1.08E-12 |
| GO:0030055 | cell-substrate junction | 42 | 9.08E-09 |
| GO:0005925 | focal adhesion | 41 | 1.22E-08 |
| GO:0005924 | cell-substrate adherens junction | 41 | 1.22E-08 |
| GO:0045177 | apical part of cell | 38 | 7.39E-08 |
| GO:0016323 | basolateral plasma membrane | 27 | 1.38E-07 |
| GO:0016324 | apical plasma membrane | 33 | 2.13E-07 |
| GO:0062023 | collagen-containing extracellular matrix | 37 | 7.22E-07 |
| GO:0005796 | Golgi lumen | 17 | 1.25E-06 |
| GO:0019897 | extrinsic component of plasma membrane | 20 | 1.62E-05 |
| **KEGG Pathway** | |  |  |
| hsa04512 | ECM-receptor interaction | 15 | 6.10E-04 |
| hsa04115 | p53 signaling pathway | 12 | 4.51E-03 |
| hsa04610 | Complement and coagulation cascades | 12 | 1.03E-02 |
| hsa04360 | Axon guidance | 19 | 1.03E-02 |
| hsa04510 | Focal adhesion | 20 | 1.08E-02 |
| hsa00512 | Mucin type O-glycan biosynthesis | 7 | 2.23E-02 |
