# Supplementary figures and images for: Identification of a Novel Risk Model: A Five-Gene Prognostic Signature for Pancreatic Cancer
Source: Hindawi journal article supplement (doi:10.1155/2022/3660110), 2022-07-08

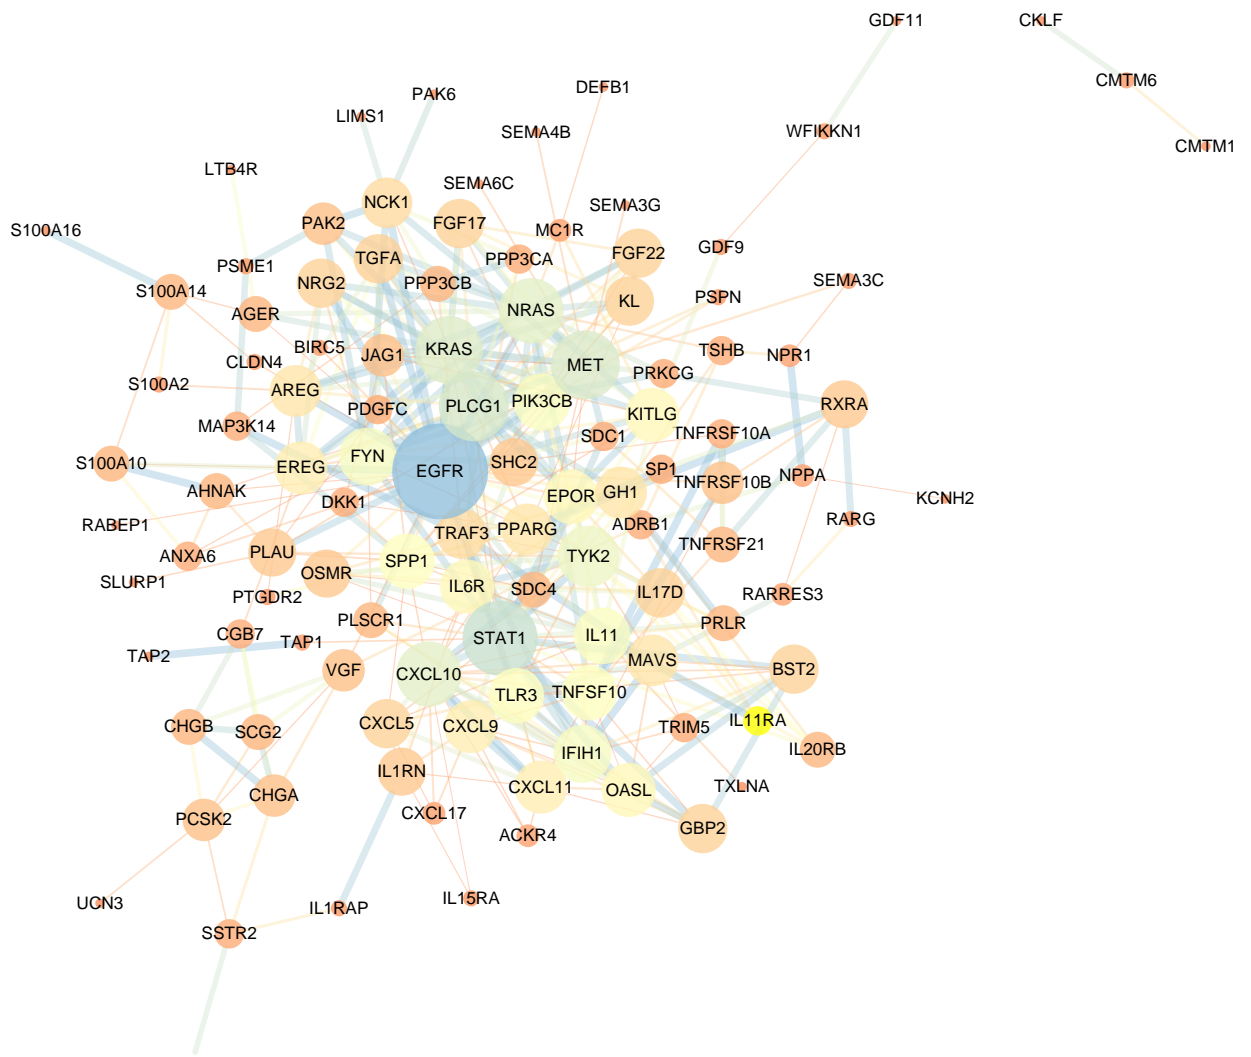

Supplement: f1 [file 3660110.f1.zip]
